# Supplementary material
Source: PubMed Central journal article supplement (PMC2840090)
Supplement: 0910212107_pnas.200910212SI.pdf [file 0910212107_pnas.200910212SI.pdf]

# Supporting Information

Das et al. 10.1073/pnas.0910212107

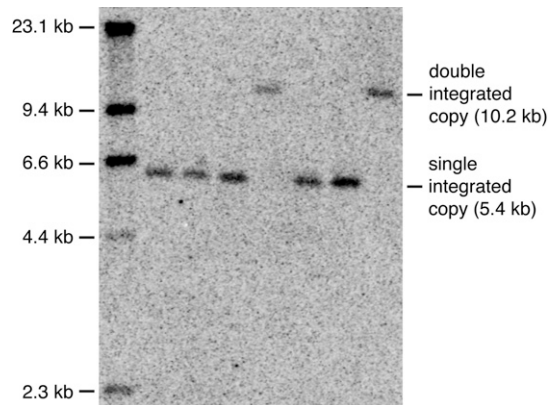

**Fig. S1.** Tandem integration of the classical variant of CTX $\phi$ . The genomic DNA from BS1 bacteria in which RS<sup>Cl</sup> had integrated successfully was subjected to Hpa1 restriction digest. Restriction fragments were separated by agarose gel electrophoresis and blotted on a PVDF membrane. The *dif1*-containing fragment was revealed by hybridization with a radioactive probe made from the Hpa1 *lacZ* fragment.

**Table S1. Strain list.**

| Strains | Genotype/phenotypes                                                                | References/resources   |
|---------|------------------------------------------------------------------------------------|------------------------|
| N16961  | O1 El Tor strain, St <sup>r</sup>                                                  | (1)                    |
| 569B    | O1 classical strain, St <sup>r</sup>                                               | D. Mazel Lab., Pasteur |
| H12     | CTX $\phi$ - O1 El Tor strain                                                      | RK Bhadra Lab., IICB   |
| H25     | CTX $\phi$ - O1 El Tor strain                                                      | RK Bhadra Lab., IICB   |
| WO-5    | CTX $\phi$ - O1 El Tor strain                                                      | RK Bhadra Lab., IICB   |
| MV18    | N16961 $\Delta lacZ \Delta(RS2 RS1 dif1)::aadA1$ ; Sp <sup>r</sup> St <sup>r</sup> | This study             |
| MV78    | MV18 <i>lacZ<sub>EC</sub>::dif1</i> ; St <sup>r</sup>                              | This study             |
| BS1     | MV78 $\Delta dif2::aadA1$ ; Sp <sup>r</sup> St <sup>r</sup>                        | This study             |
| BS2     | MV18 $\Delta dif2::arr2$ ; Sp <sup>r</sup> St <sup>r</sup> Rf <sup>r</sup>         | This study             |
| BS3     | BS2 in which $\Delta dif2::arr2$ was replaced by <i>lacZ<sub>EC</sub>::dif2</i>    | This study             |
| BS10    | BS1 $\Delta xerC::arr2$ ; Sp <sup>r</sup> St <sup>r</sup> Rf <sup>r</sup>          | This study             |
| BS11    | BS1 $\Delta recA$ ; Sp <sup>r</sup> St <sup>r</sup>                                | This study             |
| BS12    | BS2 in which $\Delta dif2::arr2$ was replaced by <i>lacZ<sub>EC</sub>::dif1</i>    | This study             |
| BS13    | BS2 in which $\Delta dif1::aadA1$ was replaced by <i>lacZ<sub>EC</sub>::dif2</i>   | This study             |
| BS14    | BS2 in which $\Delta dif1::aadA1$ was replaced by <i>lacZ<sub>EC</sub>::difG</i>   | This study             |
| BS15    | BS2 in which $\Delta dif2::arr2$ was replaced by <i>lacZ<sub>EC</sub>::difG</i>    | This study             |

1. Heidelberg JF, et al. (2000) DNA sequence of both chromosomes of the cholera pathogen *Vibrio cholerae*. *Nature* 406:477–483.

**Table S2. Plasmid list.**

| Name    | Description                                                                                                                                                       | References/resources |
|---------|-------------------------------------------------------------------------------------------------------------------------------------------------------------------|----------------------|
| pSW23T  | pSW23::oriTRP4; oriVR6Kγ; Cm <sup>r</sup>                                                                                                                         | (1)                  |
| pDS132  | pCVD442 derivative carrying the <i>sacB</i> counter selectable marker; Cm <sup>r</sup>                                                                            | (2)                  |
| pKAS32  | pGP704 derivative carrying the <i>rpsL</i> counter selectable marker; Ap <sup>r</sup>                                                                             | (3)                  |
| pBS22   | RS <sub>Cl</sub> ; pSW23T harboring the replication and integration machinery of the CTXφ prophage of <i>V. cholerae</i> strain 569B; Cm <sup>r</sup>             | This study           |
| pBS39   | pBS22 where <i>attP</i> <sup>Cl</sup> was modified into <i>attP</i> <sup>ET</sup> ; Cm <sup>r</sup>                                                               | This study           |
| pMEV30  | RS <sub>ET</sub> ; pSW23T harboring the replication and integration machinery of RS1, a CTXφ satellite phage of <i>V. cholerae</i> strain N16961; Cm <sup>r</sup> | This study           |
| pBS4    | pMEV30 in which <i>attP</i> <sup>ET</sup> was modified into <i>attP</i> <sup>Cl</sup> ; Cm <sup>r</sup>                                                           | This study           |
| pBS15   | pBS4 in which <i>attP</i> <sup>Cl</sup> was modified into <i>attP</i> <sup>mutCl</sup> ; Cm <sup>r</sup>                                                          | This study           |
| pBS35   | pMEV30 in which <i>attP</i> <sup>ET</sup> was modified into <i>attP</i> <sup>G</sup> ; Cm <sup>r</sup>                                                            | This study           |
| pMEV136 | pDS132 carrying an <i>aad1</i> cassette flanked by the upstream and downstream regions of <i>dif1</i> ; Cm <sup>r</sup> , Sp <sup>r</sup>                         | This study           |
| pBS8    | pKAS32 carrying an <i>aad1</i> cassette flanked by the upstream and downstream regions of <i>dif2</i> ; Ap <sup>r</sup> , Sp <sup>r</sup>                         | This study           |
| pMEV235 | pDS132 carrying an <i>arr2</i> cassette flanked by the upstream and downstream regions of <i>dif2</i> ; Cm <sup>r</sup> , Rf <sup>r</sup>                         | This study           |
| pMEV78  | pDS132 carrying the <i>lacZ::dif1</i> allele flanked by the upstream and downstream regions of <i>dif1</i> ; Cm <sup>r</sup>                                      | This study           |
| pBS3    | pDS132 carrying the <i>lacZ::dif2</i> allele flanked by the upstream and downstream regions of <i>dif2</i> ; Cm <sup>r</sup>                                      | This study           |
| pBS24   | pDS132 carrying the <i>lacZ::dif2</i> allele flanked by the upstream and downstream regions of <i>dif1</i> ; Cm <sup>r</sup>                                      | This study           |
| pMEV184 | pDS132 carrying the <i>lacZ::dif1</i> allele flanked by the upstream and downstream regions of <i>dif2</i> ; Cm <sup>r</sup>                                      | This study           |
| pBS42   | pDS132 carrying the <i>lacZ::difG</i> allele flanked by the upstream and downstream regions of <i>dif1</i> ; Cm <sup>r</sup>                                      | This study           |
| pBS38   | pDS132 carrying the <i>lacZ::difG</i> allele flanked by the upstream and downstream regions of <i>dif2</i> ; Cm <sup>r</sup>                                      | This study           |
| pMEV245 | pDS132 carrying an <i>arr2</i> cassette flanked by the upstream and downstream region of <i>V. cholerae xerC</i> ; Cm <sup>r</sup> , Rf <sup>r</sup>              | This study           |
| pMEV68  | pDS132 carrying the upstream and downstream regions of <i>V. cholerae recA</i> ; Cm <sup>r</sup>                                                                  | (4)                  |

- Demarre G, et al. (2005) A new family of mobilizable suicide plasmids based on broad host range R388 plasmid (IncW) and RP4 plasmid (IncPalph) conjugative machineries and their cognate *Escherichia coli* host strains. *Res Microbiol* 156:245–255.
- Philippe N, Alcaraz JP, Coursange E, Geiselmann J, Schneider D (2004) Improvement of pCVD442, a suicide plasmid for gene allele exchange in bacteria. *Plasmid* 51:246–255.
- Skorupski K, Taylor RK (1996) Positive selection vectors for allelic exchange. *Gene* 169:47–52.
- Val M-E, et al. (2008) FtsK-dependent dimer resolution on multiple chromosomes in the pathogen *Vibrio cholerae*. *PLoS Genet* 4:e1000201.

**Table S3. *dif1* integration of CTXφ in *recA*<sup>-</sup> and *xerC*<sup>-</sup> strains**

| Phage machinery | <i>attP</i> sequence | Host machinery           | % Integration | Screened colonies |
|-----------------|----------------------|--------------------------|---------------|-------------------|
| El Tor          | El Tor               | <i>recA</i> <sup>-</sup> | 100.0         | 180               |
| El Tor          | El Tor               | <i>xerC</i> <sup>-</sup> | <0.5          | 183               |
| Classical       | Classical            | <i>recA</i> <sup>-</sup> | 47.4          | 76                |
| Classical       | Classical            | <i>xerC</i> <sup>-</sup> | <0.2          | 550               |

**Table S4. The category of the *attP* attachment region of various CTXφ variants**

| Phage origin | <i>attP</i> category |
|--------------|----------------------|
| VC44RS1J2E   | El Tor               |
| AB299799     | El Tor               |
| VC44RS1J1E   | El Tor               |
| N16961       | El Tor               |
| O139AY101180 | El Tor               |
| VCU83796     | El Tor               |
| AF510994     | Classical            |
| AF175708     | Classical            |
| AY349175     | Classical            |
| DQ012295     | Classical            |
| O395LRS2C    | Classical            |
| O395SRS2C    | Classical            |
| AF110029     | Classical            |
| AF238372     | Classical            |
| AF30279      | G                    |
| AF416590     | G                    |

**Table S5. Oligonucleotides used in this study**

| Name            | Sequence                                                                  |
|-----------------|---------------------------------------------------------------------------|
| Dif1top         | 5'ATCAGTGCGCATTATGTATGTTATGTTAAATGGA                                      |
| Dif1bot         | 5'CTGTCCATTTAACATAACATACATAATGCGCACTGAT                                   |
| Dif2top         | 5'ATCAATGCGCATTACGTGCGTTATGTTAAATGGA                                      |
| Dif2bot         | 5'CTGTCCATTTAACATAACGCACGTAATGCGCATTGAT                                   |
| DifGtop         | 5'ATCAGTGCGCATTAGGTATATTATGTTAAATGGA                                      |
| DifGbot         | 5'CTGTCCATTTAACATAATATACCTAATGCGCACTGAT                                   |
| AttPdif1top     | 5'TACGCCCTTAGTGCGTATTATGTGGCGCGGCATTATGTTGAGGGTTCCG                       |
| AttPdif1bot     | 5'CTGCGGAACCCGTAACATAATGGCGTATAATACGCATTAAGGGCGTA                         |
| AttPmutClbot    | 5'CTGCGGAACCCGTAACATAATGGCGAGTAATACGCATTAAGGGCGTA                         |
| AttPmuCltop     | 5'TACGCCCTTAGTGCGTATTACGTGGCGCGGCATTATGTTGAGGGTTCCG                       |
| AttPGtop        | 5'TACGCCCTTAGTGCGTATTAGGTGGTGGCGGCATTATGTTGAGGGTTCCG                      |
| AttPGbot        | 5'CTGCGGAACCCGTAACATAATGCCCTAATACGCATTAAGGGCGTA                           |
| Dif2topextended | 5'TAATCTAGATTATGCCTTAATTTAACATAACGCACGTAATGCGCATTAAAGTGTTCGATAGGTGCGACGAT |
| Dif2botextended | 5'ATCGTCGACCTACGAACACTTAATGCGCATTACGTGCGTTATGTTAAATTAAGGCATAATCTAGATTA    |
| DifGtopextended | 5'CAATCTAGACCGCCGCTTAGTGCGCATTAGGTATATTATGTTAAATTAAGGCATAATGTCGACAA       |
| DifGbotextended | 5'TTGTCGACATTATGCCTTAATTTAACATAATATACCTAATGCGCACTAAGGGCGGCTAGATTG         |
| Dif1topextended | 5'CAATCTAGACCGCCGCTTAGTGCGCATTATGTATGTTATGTTAAATTAAGGCATAATGTCGACAA       |
| Dif1botextended | 5'TTGTCGACATTATGCCTTAATTTAACATAACATACATAATGCGCACTAAGGGCGGCTAGATTG         |

**Table S6. Sequence of *dif1* in different CTX $\phi$ -negative strains**

| Strain  | Serotype         | <i>dif1</i> sequence           | CTX | Sources    |
|---------|------------------|--------------------------------|-----|------------|
| N16961  | O1 (ET)          | AGTGCGTATTA TGTATG TTATGTTAAAT | +   | (1)        |
| O395    | O1 (CI)          | AATGCGTATTA CGTGCG TTATGTTAAAT | +   | CP000626.1 |
| H25     | O1 (ET)          | AGTGCGTATTA GGTATA TTATGTTAAAT | -   | This study |
| H12     | O1 (ET)          | AGTGCGTATTA GGTATA TTATGTTAAAT | -   | This study |
| WO5     | O1 (ET)          | AGTGCGTATTA GGTATA TTATGTTAAAT | -   | This study |
| Ku-40   | O1 (ET)          | AGTGCGTATTA GGTATA TTATGTTAAAT | -   | AY368493.1 |
| 93333   | O139             | AGTGCGTATTA GGTATA TTATGTTAAAT | -   | AY368494.1 |
| AM19226 | Non O1/ non O139 | AGTGCGTATTA GGTATA TTATGTTAAAA | -   | (2)        |
| 1587    | Non O1/ non O139 | AGTGCGTATTA GGTATA TTATGTTAAAT | -   | (2)        |
| RC385   | Non O1/ non O139 | AGTGCGTATTA GGTATA TTATGTTAAAA | -   | (2)        |

1. Val M-E, et al. (2008) FtsK-dependent dimer resolution on multiple chromosomes in the pathogen *Vibrio cholerae*. *PLoS Genet* 4:e1000201.

2. Faruque SM, et al. (2007) Genomic analysis of the Mozambique strain of *Vibrio cholerae* O1 reveals the origin of El Tor strains carrying classical CTX prophage. *Proc Natl Acad Sci USA* 104:5151-5156.

**Table S7. *difG* integration of CTX $\phi$  on the second chromosome of *V. cholerae***

| Phage machinery | <i>attP</i> sequence | <i>dif</i> sequence | % integration | Number of screened colonies |
|-----------------|----------------------|---------------------|---------------|-----------------------------|
| El Tor          | El Tor               | <i>difG</i>         | <0.2          | 625                         |
| Classic         | Classic              | <i>difG</i>         | <0.1          | 1526                        |
| El Tor          | G                    | <i>difG</i>         | 2.2           | 1598                        |
